# Supplementary material
Source: Springer Nature journal article supplement (https://www.springermedizin.de/resource/supplementary/12876_2009_393_MOESM6_ESM.pdf/9436948)

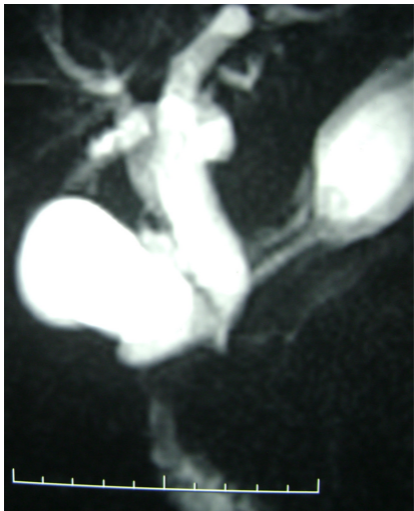

Supplement: MOESM6 [file 9436948]
